# Supplementary material for: Cathepsin C Regulates Cytokine-Induced Apoptosis in β-Cell Model Systems
Source: MDPI journal article supplement (doi:10.3390/genes12111694), 2021-10-25
Supplement: s1 [file s1]

Supplementary Figures – whole western blots

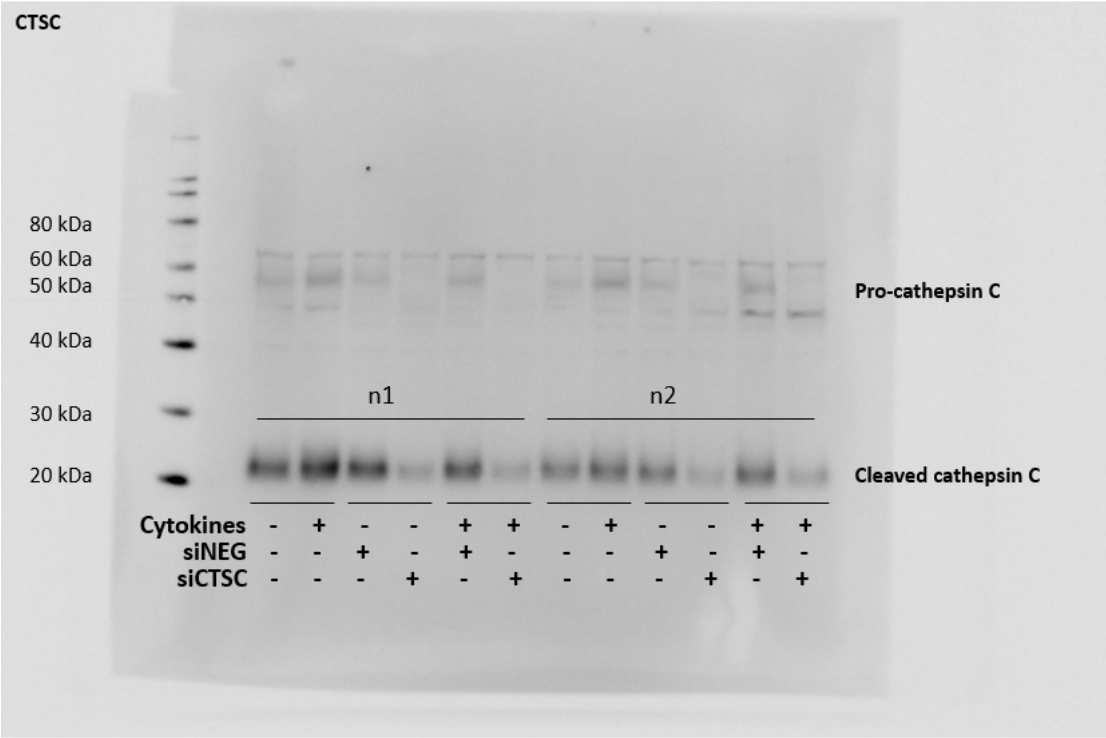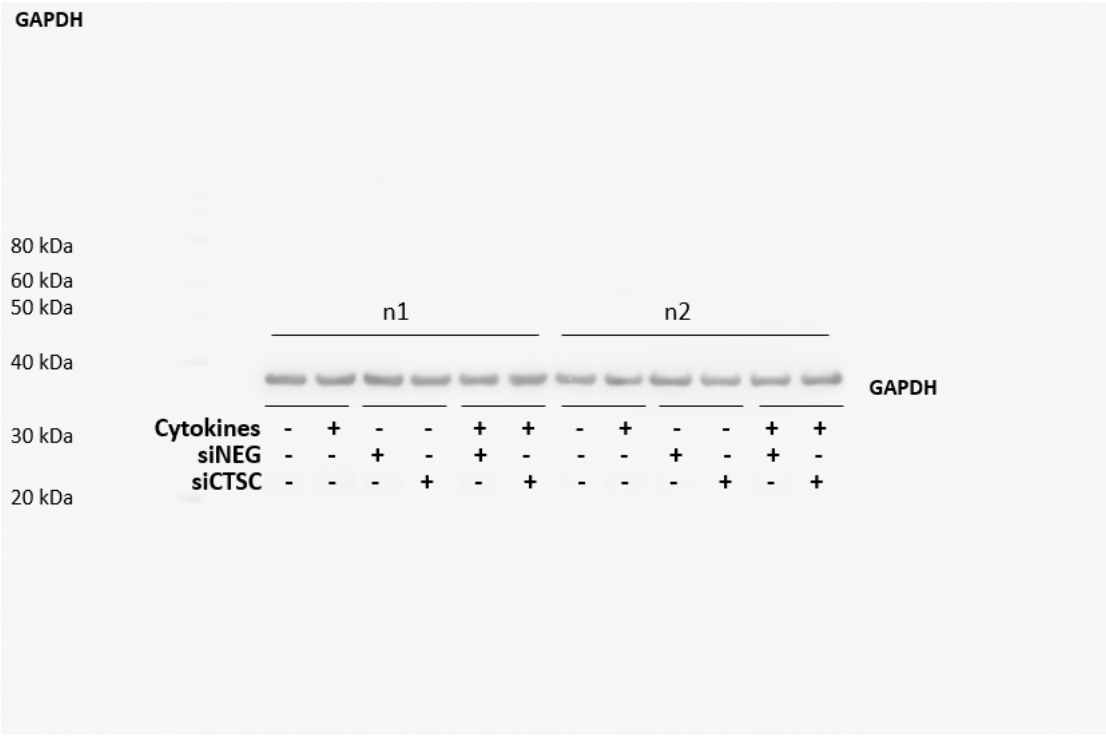

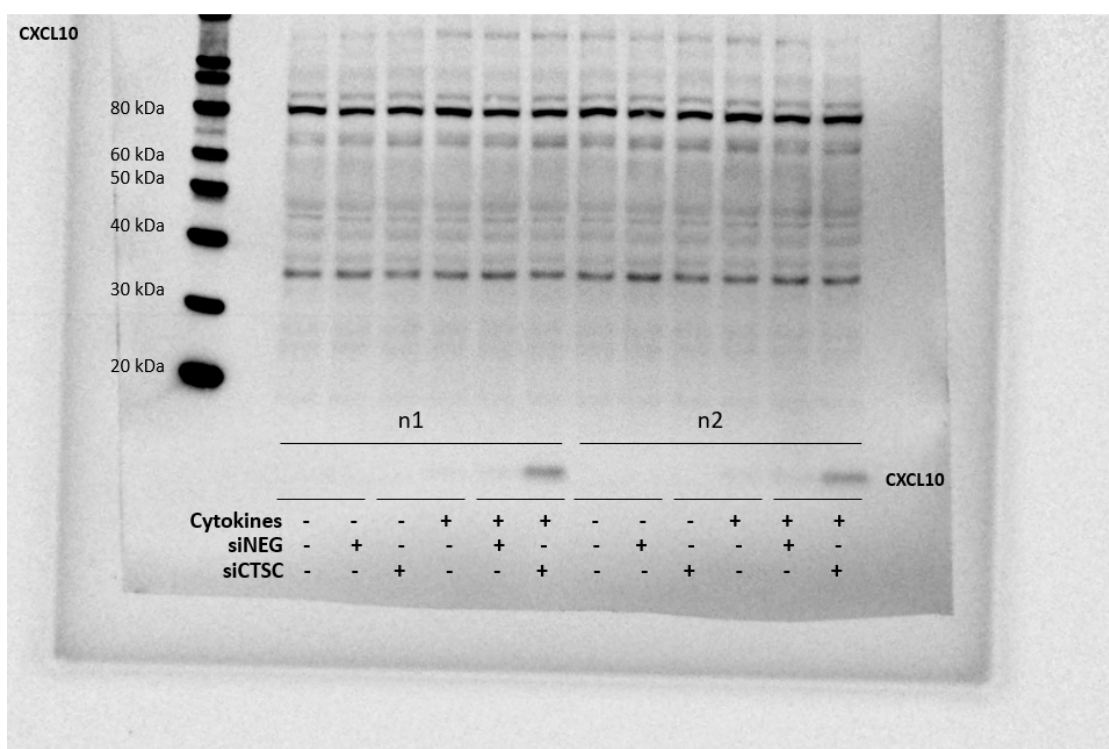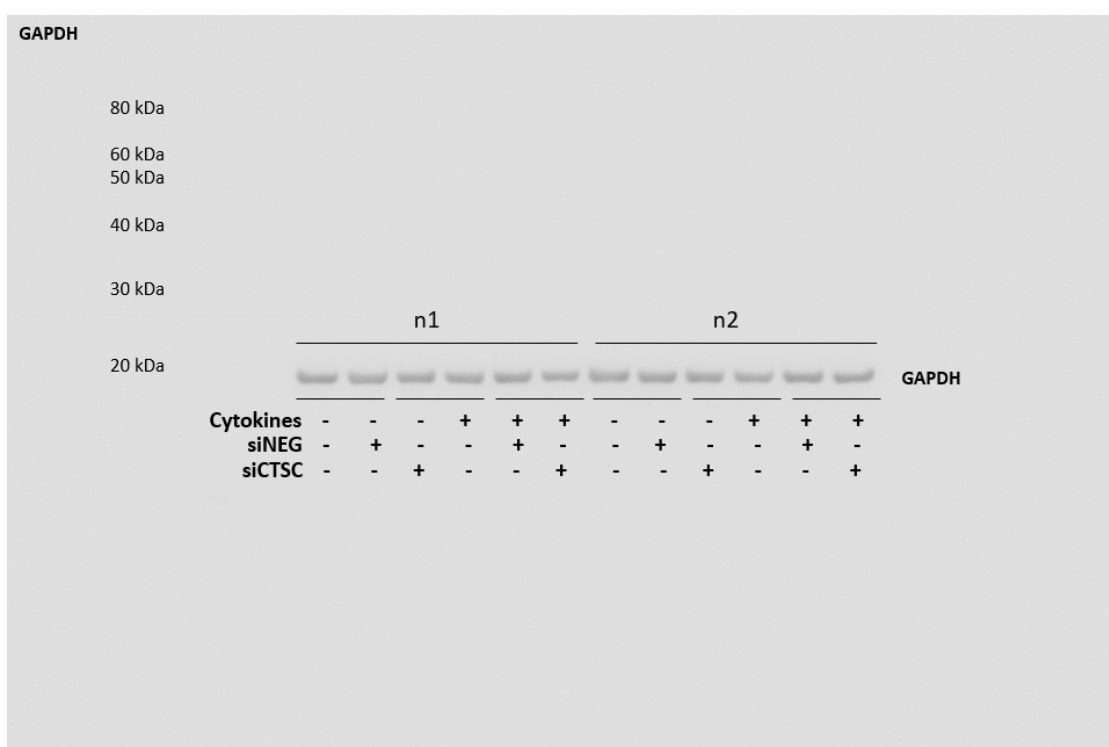

**Supplementary Figure S4. Whole western blots of CTSC and CXCL10 upon CTSC KD in 1.1B4 cells.** Immunoblotting of CTSC and CXCL10 in 1.1B4 cells transfected with siRNA against CTSC or a non-targeting negative control siRNA, untreated or exposed to IL-1 $\beta$ , IFN- $\gamma$  and TNF- $\alpha$  for 24 h. GAPDH was used as loading control.

# Cleaved caspase-3

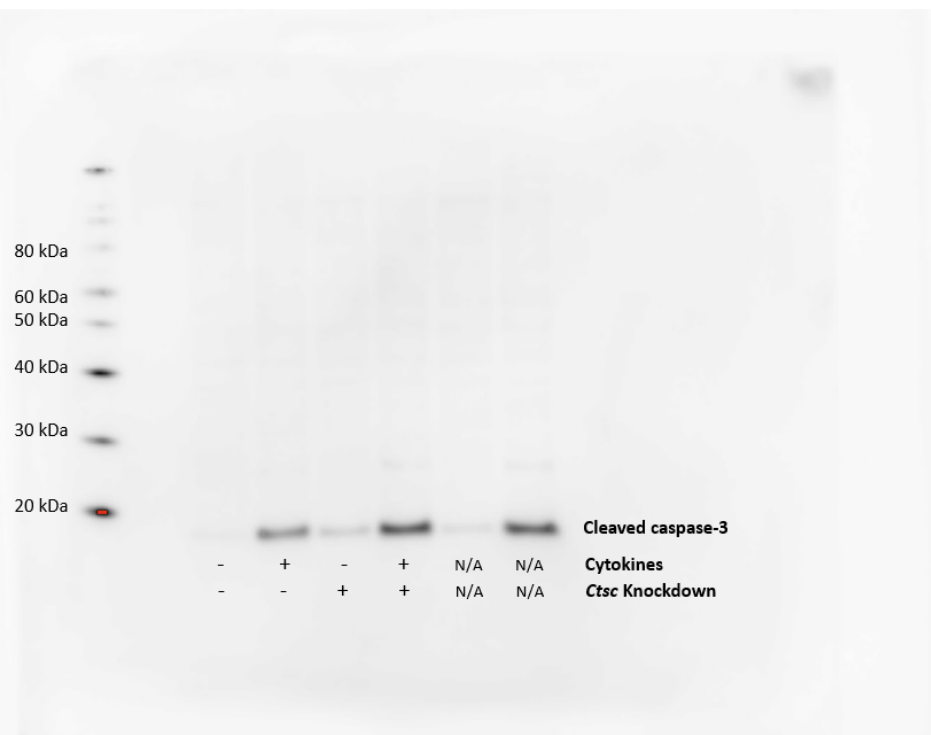

# GAPDH

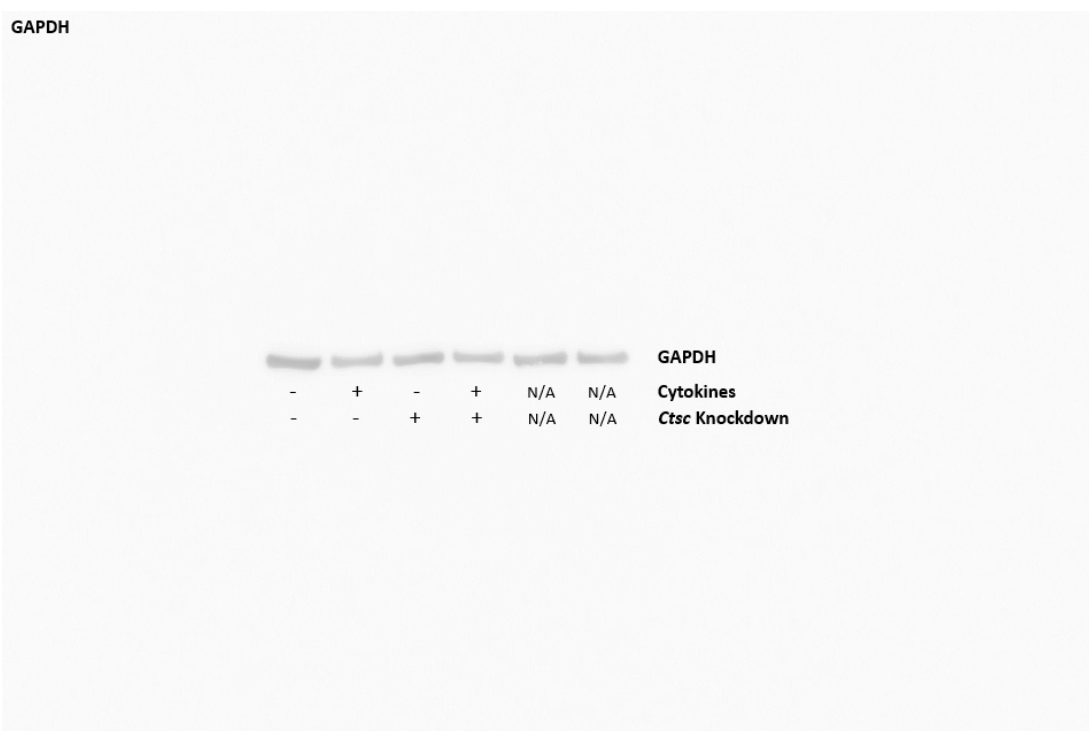

# phospho-JNK

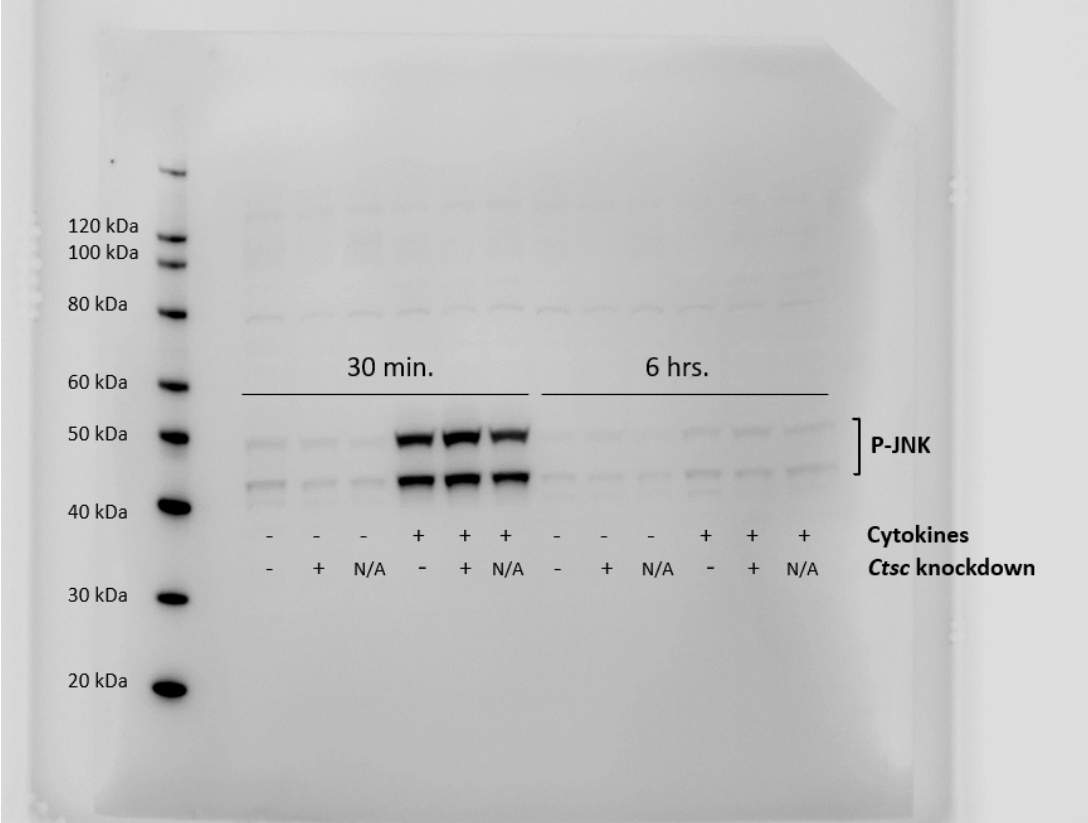

# JNK and GAPDH

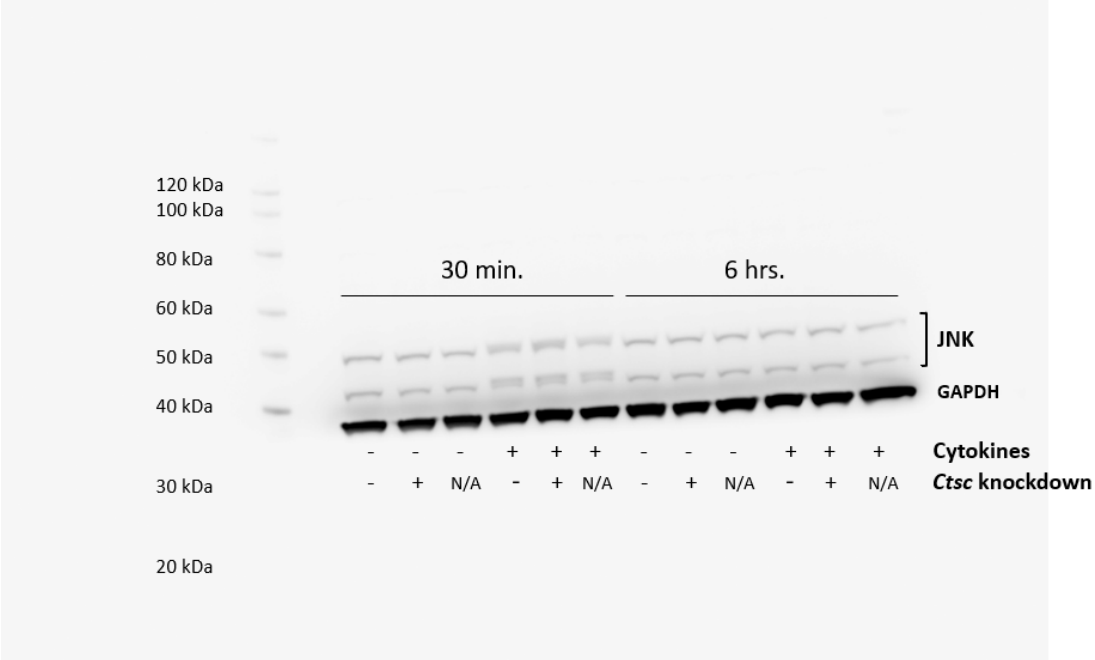

phosho-ERK

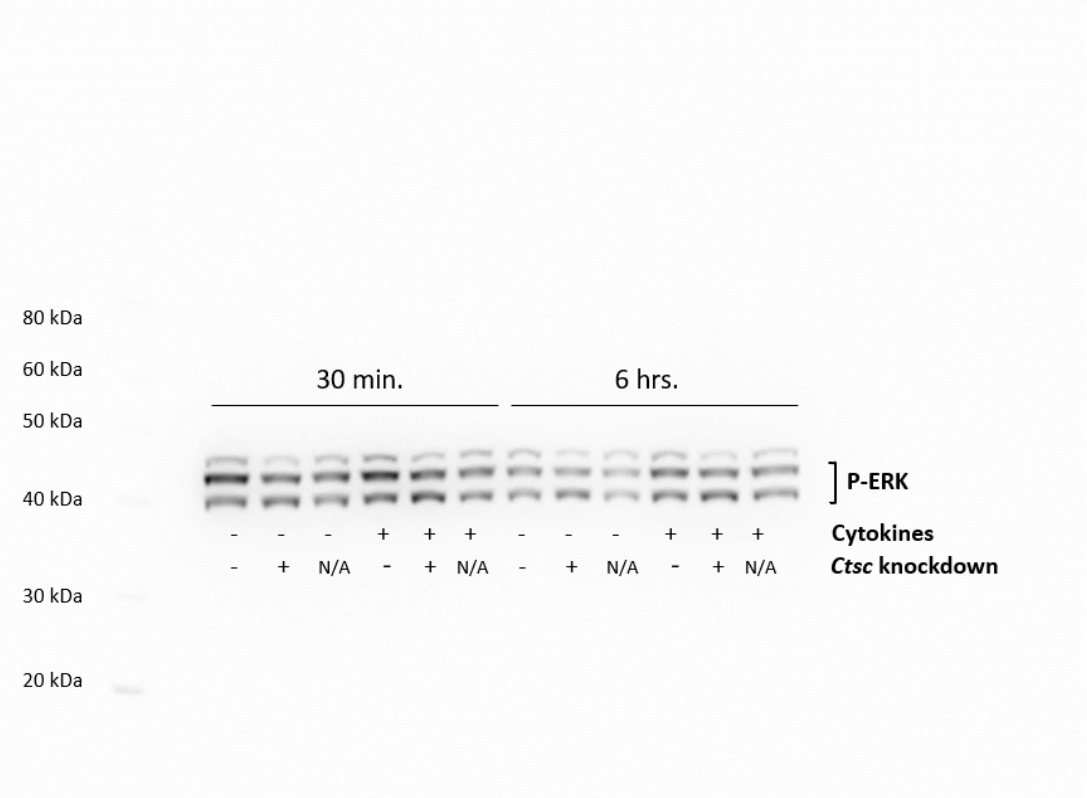

ERK

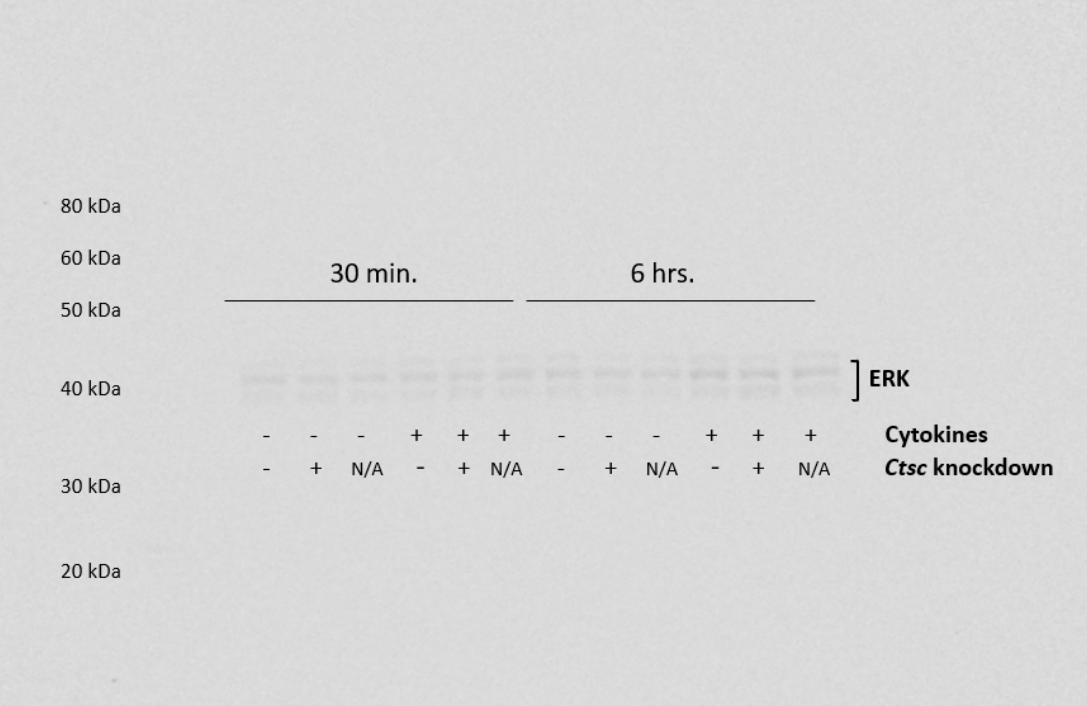

**GAPDH**

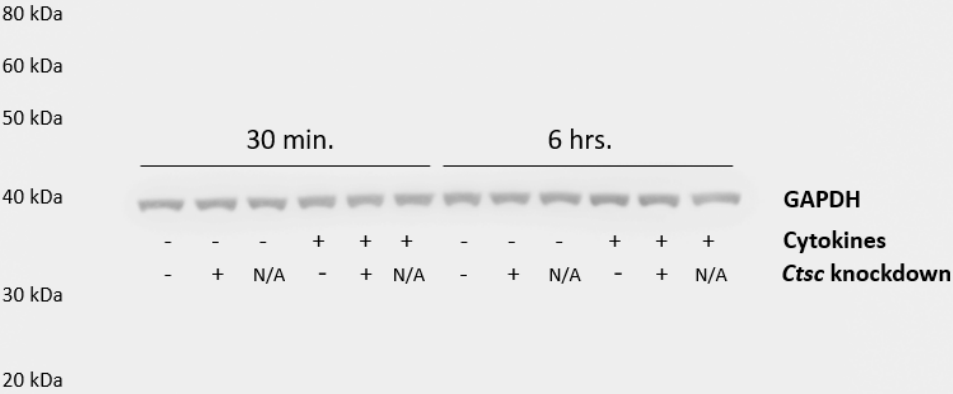

**phospho-p38**

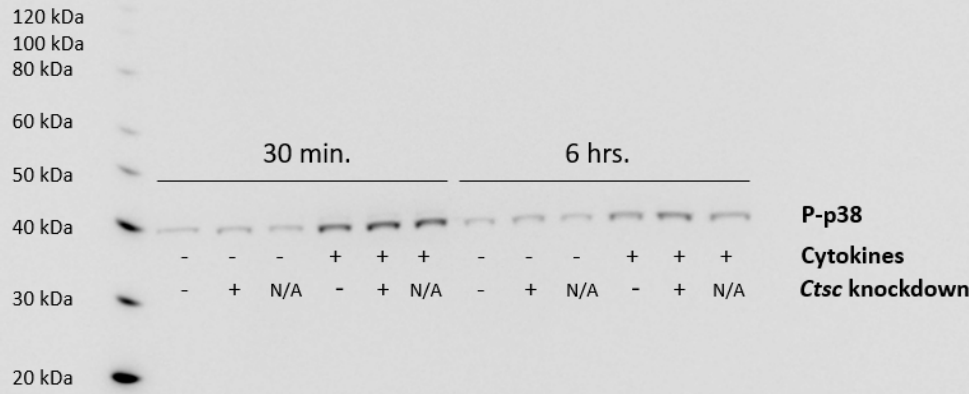

p38

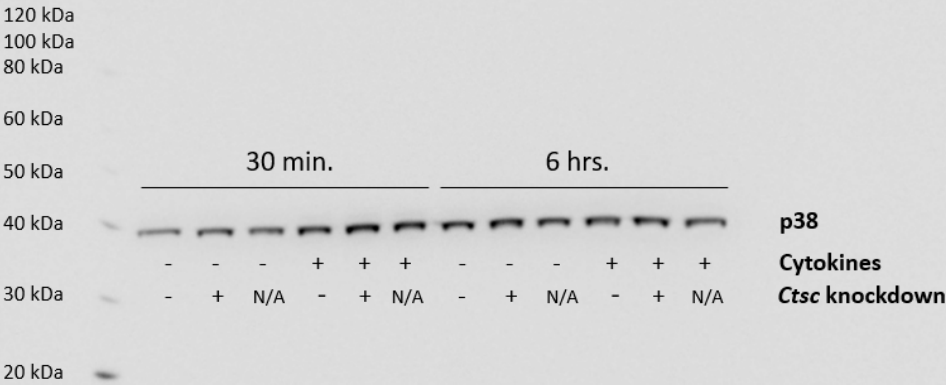

GAPDH

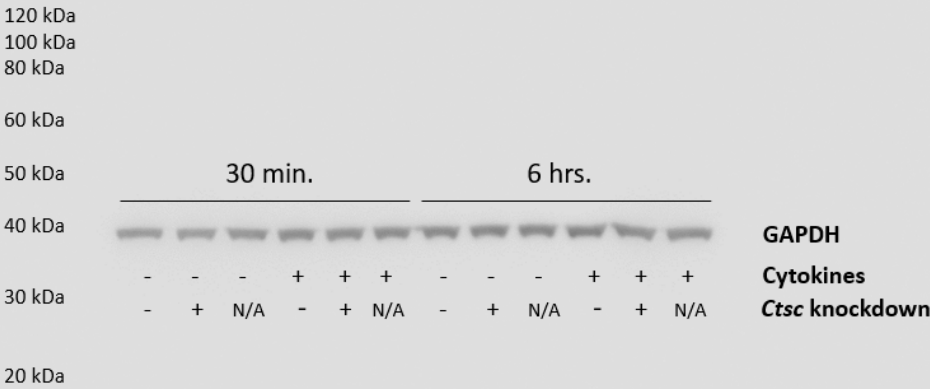

iNOS

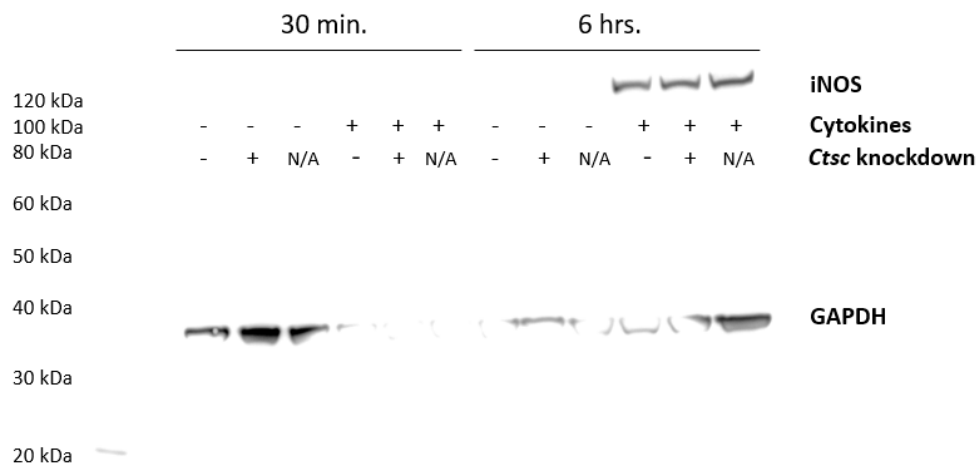

GAPDH

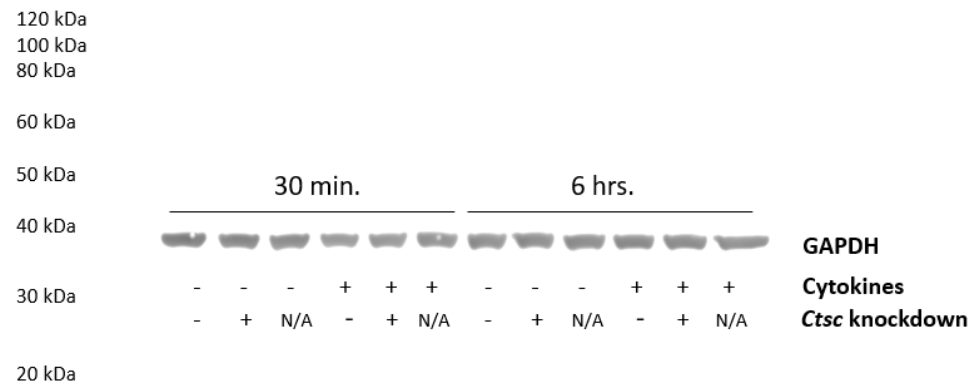

**Supplementary Figure S5. Whole western blots of cleaved caspase-3, the MAPKs and iNOS upon *Ctsc* KD in INS-1E cells.** Immunoblotting of cleaved caspase-3, phosphorylated and total JNK, ERK and p38 and iNOS in INS-1E cells transfected with siRNA against *Ctsc* or a non-targeting negative control siRNA, untreated or exposed to IL-1 $\beta$  and IFN- $\gamma$  for 30 min and 6 h. Gapdh was used as loading control.
