# Supplementary material for: Cathepsin C Regulates Cytokine-Induced Apoptosis in β-Cell Model Systems
Source: MDPI journal article supplement (doi:10.3390/genes12111694), 2021-10-25
Supplement: s1 [file s1]

**Supplementary Table S1. Pancreatic islet donor information.** Donor characteristics and human pancreatic islet specifications: unique identifier, gender: male (M)/ female (F), age (years), BMI (kg/m<sup>2</sup>), HbA1c (%), origin/source, isolation centre, diabetes history, cause of death. islet viability (%) and purity (%).

| Islet preparation        | 1           | 2           | 3            | 4           | 5           |
|--------------------------|-------------|-------------|--------------|-------------|-------------|
| Unique identifier        | HP-18144-01 | HP-18151-01 | HP-18270-01  | HP-18304-01 | HP-19256-01 |
| Gender (M/F)             | M           | F           | M            | M           | M           |
| Donor age (years)        | 47          | 57          | 31           | 21          | 64          |
| BMI (kg/m <sup>2</sup> ) | 28.1        | 24.1        | 22.0         | 27.3        | 25.5        |
| HbA1c (%)                | 5.8         | 5.8         | 5.5          | 5.4         | 5.4         |
| Origin/source            | UNOS        | UNOS        | UNOS         | UNOS        | UNOS        |
| Isolation centre         | Prodo Labs  | Prodo Labs  | Prodo Labs   | Prodo Labs  | Prodo Labs  |
| Diabetes history         | No          | No          | No           | No          | No          |
| Cause of death           | Head trauma | Stroke      | Anoxic event | Head trauma | Stroke      |
| Islet viability (%)      | 95          | 95          | 95           | 95          | 95          |
| Islet purity (%)         | 85          | 90          | 90-95        | 85          | 90-95       |
